# Supplementary material for: Ca2+/vacancies and O2−/F−ordering in new oxyfluoride pyrochlores Li2xCa1.5−x□0.5−xM2O6F (M = Nb,Ta) for 0 ≤ x ≤ 0.5
Source: Royal Society of Chemistry journal article supplement (doi:10.1039/b701863k), 2007-01-01
Supplement: b701863k.pdf [file b701863k.pdf]

# Ca<sup>2+</sup>/vacancies and O<sup>2-</sup>/F<sup>-</sup> ordering in new oxyfluoride pyrochlores

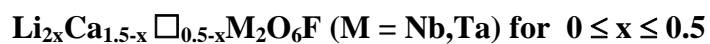

Françoise LE BERRE<sup>a</sup>, Marie-Pierre CROSNIER-LOPEZ<sup>a</sup>, Cyrille GALVEN<sup>a</sup>,  
Jean-Louis FOURQUET<sup>a</sup>, Christophe LEGEIN<sup>a</sup>, Monique BODY<sup>b</sup>, Jean-Yves BUZARE<sup>b</sup>

## Electronic supplementary information (ESI)

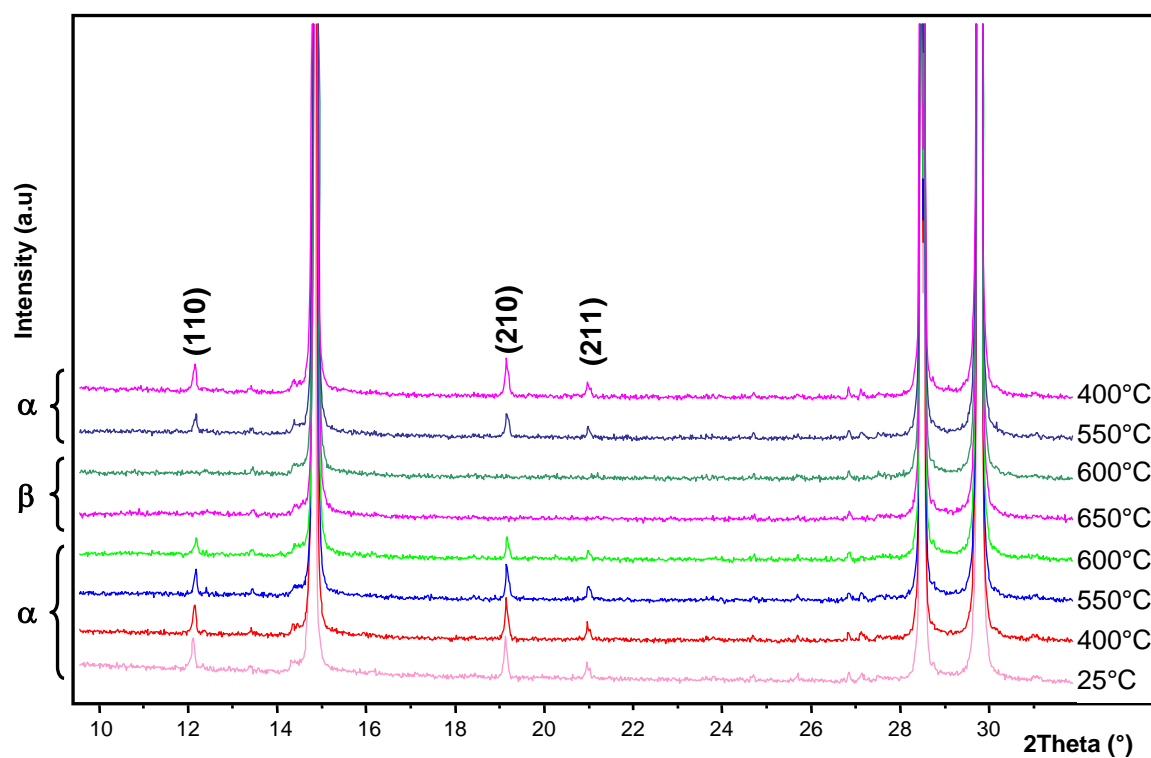

**Thermal evolution of Ca<sub>1.5</sub>□<sub>0.5</sub>Ta<sub>2</sub>O<sub>6</sub>F X-ray powder diffraction patterns showing the α ↔ β transition**

**Crystallographic parameters and operating conditions of the X-ray data collection and of the refinement  
for  $\alpha$  and  $\beta$ -Ca<sub>1.5</sub>□<sub>0.5</sub>Nb<sub>2</sub>O<sub>6</sub>F**

|                                                                                                            | $\alpha$ -Ca <sub>1.5</sub> □ <sub>0.5</sub> Nb <sub>2</sub> O <sub>6</sub> F                                                                                                         | $\beta$ -Ca <sub>1.5</sub> □ <sub>0.5</sub> Nb <sub>2</sub> O <sub>6</sub> F                                                                                              |
|------------------------------------------------------------------------------------------------------------|---------------------------------------------------------------------------------------------------------------------------------------------------------------------------------------|---------------------------------------------------------------------------------------------------------------------------------------------------------------------------|
| <b>Symmetry</b>                                                                                            | Cubic                                                                                                                                                                                 | Cubic                                                                                                                                                                     |
| <b>Space Group</b>                                                                                         | P4 <sub>3</sub> 2 (No. 212) – acentric                                                                                                                                                | Fd $\bar{3}$ m (No. 227)                                                                                                                                                  |
| <b>a= b =c /Å</b>                                                                                          | 10.4506(7)                                                                                                                                                                            | 10.444(2)                                                                                                                                                                 |
| <b>V /Å<sup>3</sup></b>                                                                                    | 1141.4(2)                                                                                                                                                                             | 1139.2(6)                                                                                                                                                                 |
| <b>Z</b>                                                                                                   | 8                                                                                                                                                                                     | 8                                                                                                                                                                         |
| <b>Formula weight /g</b>                                                                                   | 360.92                                                                                                                                                                                | 360.92                                                                                                                                                                    |
| <b>Dcalc /gcm<sup>-3</sup></b>                                                                             | 4.20                                                                                                                                                                                  | 4.21                                                                                                                                                                      |
| <b>Temperature /°C</b>                                                                                     | 20                                                                                                                                                                                    | 20                                                                                                                                                                        |
| <b>Radiation /Å</b>                                                                                        | Mo K $\alpha$                                                                                                                                                                         | Mo K $\alpha$ (graphite monochromatized)                                                                                                                                  |
| <b>Crystal volume /10<sup>-4</sup> mm<sup>3</sup></b>                                                      | /                                                                                                                                                                                     | 13.99                                                                                                                                                                     |
| <b>Diffractometer</b>                                                                                      | Bruker-Nonius Kappa CCD                                                                                                                                                               | Siemens AED2 four-circle                                                                                                                                                  |
| <b>Scanning mode – aperture /mm</b>                                                                        |                                                                                                                                                                                       | $\omega/2\theta$ - 4 x 4                                                                                                                                                  |
| <b>Exposure time per frame /s</b>                                                                          | 240                                                                                                                                                                                   |                                                                                                                                                                           |
| <b>Range registered :</b>                                                                                  |                                                                                                                                                                                       |                                                                                                                                                                           |
| <b>2<math>\theta</math> max /°</b>                                                                         | 79.97                                                                                                                                                                                 | 98                                                                                                                                                                        |
| <b>h, k, l max</b>                                                                                         | 15, 16, 18                                                                                                                                                                            | 14, 15, 22                                                                                                                                                                |
| <b>Absorption correction</b>                                                                               | no                                                                                                                                                                                    | Gaussian method                                                                                                                                                           |
| <b>Transmission factors, T<sub>max</sub>, T<sub>min</sub></b>                                              |                                                                                                                                                                                       | 0.567, 0.763                                                                                                                                                              |
| <b>R<sub>int</sub></b>                                                                                     | 0.0523                                                                                                                                                                                | 0.0201                                                                                                                                                                    |
| <b>Secondary extinction coefficient</b>                                                                    | 0.052(3)                                                                                                                                                                              | 0.0024(2)                                                                                                                                                                 |
| <b>Reflections measured</b>                                                                                |                                                                                                                                                                                       |                                                                                                                                                                           |
| <b>Total</b>                                                                                               | 11758                                                                                                                                                                                 | 954                                                                                                                                                                       |
| <b>Independent</b>                                                                                         | 1109                                                                                                                                                                                  | 309                                                                                                                                                                       |
| <b>Number of refined parameters</b>                                                                        | 35                                                                                                                                                                                    | 11                                                                                                                                                                        |
| <b>Weighting scheme</b>                                                                                    | W = 1/[\sigma <sup>2</sup> (F <sub>o</sub> <sup>2</sup> )+(0.1337 x P) <sup>2</sup> +12.46 x P]<br>where P = 1/3[Max(F <sub>o</sub> <sup>2</sup> ,0) + 2F <sub>c</sub> <sup>2</sup> ] | W = 1/[\sigma <sup>2</sup> (F <sub>o</sub> <sup>2</sup> )+(0.10 x P) <sup>2</sup> ]<br>where P = 1/3[Max(F <sub>o</sub> <sup>2</sup> ,0) + 2F <sub>c</sub> <sup>2</sup> ] |
| <b>Electron density in final Fourier difference map<br/>max, min /e<sup>-</sup>Å<sup>-3</sup></b>          | 0.75, -3.48                                                                                                                                                                           | 0.96, -0.70                                                                                                                                                               |
| <b>R<sub>1</sub> for data with F<sub>o</sub> &gt; 4<math>\sigma</math>(F<sub>o</sub>) and for all data</b> | 0.0484 (for 934), 0.0619 (for all)                                                                                                                                                    | 0.0279( for 279 data), 0.0345 (for all)                                                                                                                                   |
| <b>wR<sub>2</sub></b>                                                                                      | 0.1763                                                                                                                                                                                | 0.0689                                                                                                                                                                    |

Anisotropic thermal parameters for  $\alpha$  and  $\beta$ -Ca<sub>1.5</sub>□<sub>0.5</sub>Nb<sub>2</sub>O<sub>6</sub>F

|            | $\alpha$ Form - P4 <sub>3</sub> 2 |                 |                 |                 |                 |                 | $\beta$ Form - Fd $\bar{3}$ m |                 |                 |                 |                 |                 |
|------------|-----------------------------------|-----------------|-----------------|-----------------|-----------------|-----------------|-------------------------------|-----------------|-----------------|-----------------|-----------------|-----------------|
|            | U <sub>11</sub>                   | U <sub>22</sub> | U <sub>33</sub> | U <sub>23</sub> | U <sub>13</sub> | U <sub>12</sub> | U <sub>11</sub>               | U <sub>22</sub> | U <sub>33</sub> | U <sub>23</sub> | U <sub>13</sub> | U <sub>12</sub> |
| <b>Ca</b>  | 0.0147(4)                         | 0.0116(3)       | 0.0116(3)       | -0.0028(3)      | 0.0032(2)       | 0.0032(2)       | 0.0186(7)                     | 0.0186(7)       | 0.0186(7)       | -0.0059(7)      | -0.0059(7)      | -0.0059(7)      |
| <b>Nb1</b> | 0.0089(2)                         | 0.0097(2)       | 0.0097(2)       | -0.0021(1)      | -0.0006(1)      | -0.0006(1)      | 0.0099(3)                     | 0.0099(3)       | 0.0099(3)       | -0.0012(2)      | -0.0012(2)      | -0.0012(2)      |
| <b>Nb2</b> | 0.0108(2)                         | 0.0108(2)       | 0.0108(2)       | -0.0016(1)      | -0.0016(1)      | -0.0016(1)      | 0.0099(3)                     | 0.0099(3)       | 0.0099(3)       | -0.0012(2)      | -0.0012(2)      | -0.0012(2)      |
| <b>O1</b>  | 0.0088(9)                         | 0.006(1)        | 0.010(1)        | -0.0038(7)      | 0.0007(7)       | 0.0008(7)       | 0.014(2)                      | 0.012(2)        | 0.012(2)        | 0.007(2)        | /               | /0              |
| <b>O2</b>  | 0.0092(9)                         | 0.006(1)        | 0.011(2)        | 0.0021(7)       | -0.0004(7)      | 0.0006(8)       | 0.014(2)                      | 0.012(2)        | 0.012(2)        | 0.007(2)        | /               | /0              |
| <b>F</b>   | 0.0124(7)                         | 0.012(1)        | 0.012(1)        | 0.0021(7)       | 0.0021(7)       | 0.0021(7)       | 0.021(3)                      | 0.021(3)        | 0.021(3)        | /               | /               | /               |

Conditions of X-ray data collection and crystallographic characteristics of  $\alpha$  and  $\beta$ -Ca<sub>1.5</sub>□<sub>0.5</sub>Ta<sub>2</sub>O<sub>6</sub>F

|                                                    | $\alpha$ -Ca <sub>1.5</sub> □ <sub>0.5</sub> Ta <sub>2</sub> O <sub>6</sub> F             | $\beta$ -Ca <sub>1.5</sub> □ <sub>0.5</sub> Ta <sub>2</sub> O <sub>6</sub> F              |
|----------------------------------------------------|-------------------------------------------------------------------------------------------|-------------------------------------------------------------------------------------------|
| <b>Diffractometer</b>                              | X'pert MPD-PRO                                                                            |                                                                                           |
| <b>Radiation</b>                                   | CuK $\alpha$ , 40kV, 35mA                                                                 |                                                                                           |
| <b>Divergence, antiscattering slits [°]</b>        | 0.50                                                                                      |                                                                                           |
| <b>Receiving slit [°]</b>                          | 0.25                                                                                      |                                                                                           |
| <b>Angular range [°2<math>\theta</math>]</b>       | 5-130                                                                                     |                                                                                           |
| <b>Step scan increment [°2<math>\theta</math>]</b> | 0.017                                                                                     |                                                                                           |
| <b>Count time [sec/step]</b>                       | 210                                                                                       |                                                                                           |
| <b>Miscellaneous</b>                               | room temperature, sample rotation (16 rpm)                                                |                                                                                           |
| <b>Space group</b>                                 | P4 <sub>3</sub> 32 (No.212)                                                               | Fd $\bar{3}$ m (No.227)                                                                   |
| <b>Cell parameters [Å]</b>                         | A = 10.43210(9)                                                                           | a = 10.4331(1)                                                                            |
| <b>Volume / Z</b>                                  | 1135.3 (9) / Z = 4                                                                        | 1135.64(1)Å <sup>3</sup> / Z = 4                                                          |
| <b>Number of reflections</b>                       | 234                                                                                       | 65                                                                                        |
| <b>Number of refined parameters</b>                | 27                                                                                        | 16                                                                                        |
| <b>Halfwidth parameters</b>                        | U = 0.0091(6), V = -0.0047(6), W = 0.0040(2)                                              | U = 0.0055(7), V = -0.0024(9), W = 0.0061(3)                                              |
| <b>Peak shape</b>                                  | Pseudo-Voigt 0.58(2)                                                                      | Pseudo-Voigt 0.38(3)                                                                      |
| <b>Zero point [°2<math>\theta</math>]</b>          | 0.2462(6)                                                                                 | 0.2316(9)                                                                                 |
| <b>Asymmetry parameters</b>                        | P1 = -0.103(6), P2 = 0.023(2)                                                             | P1 = -0.019(8), P2 = 0.013(2)                                                             |
| <b>Reliability factors</b>                         | R <sub>p</sub> = 9.70, R <sub>wp</sub> = 9.59, $\chi^2$ = 4.73, R <sub>Bragg</sub> = 2.49 | R <sub>p</sub> = 7.53, R <sub>wp</sub> = 8.10, $\chi^2$ = 6.55, R <sub>Bragg</sub> = 2.20 |

R<sub>p</sub> and R<sub>wp</sub> are conventional Rietveld values calculated after background subtraction.

**Anisotropic thermal parameters for  $\alpha$  and  $\beta$ -Ca<sub>1.5</sub>□<sub>0.5</sub>Ta<sub>2</sub>O<sub>6</sub>F**

|            | <b>Form <math>\alpha</math> - P4<sub>3</sub>32</b> |              |              |              |              |              | <b>Form <math>\beta</math> - Fd <math>\bar{3}</math> m</b> |              |              |              |              |              |
|------------|----------------------------------------------------|--------------|--------------|--------------|--------------|--------------|------------------------------------------------------------|--------------|--------------|--------------|--------------|--------------|
|            | $\beta_{11}$                                       | $\beta_{22}$ | $\beta_{33}$ | $\beta_{12}$ | $\beta_{13}$ | $\beta_{23}$ | $\beta_{11}$                                               | $\beta_{22}$ | $\beta_{33}$ | $\beta_{12}$ | $\beta_{13}$ | $\beta_{23}$ |
| <b>Ta1</b> | -2(9)                                              | 6(6)         | 6(6)         | -6(2)        | -6(2)        | 12(9)        | 10(1)                                                      | 10(1)        | 10(1)        | 0.3(4)       | 0.3(4)       | 0.3(4)       |
| <b>Ta2</b> | 5(5)                                               | 5(5)         | 5(5)         | 2(9)         | 2(9)         | 2(9)         |                                                            |              |              |              |              |              |
